# Supplementary material
Source: PubMed Central journal article supplement (PMC7006500)
Supplement: NIHMS1546380-supplement-Supp_1.pdf [file NIHMS1546380-supplement-Supp_1.pdf]

Supporting Information for

# **Bedding-generated particulate matter: potential implications for rodent studies**

Neelakshi Hudda<sup>a</sup>, John L. Durant<sup>a,b</sup>, Alexandra Nemeth<sup>c</sup>, Phyllis Mann<sup>c</sup>, Jocelyn Petitto<sup>d</sup>, Doug Brugge<sup>b, f</sup>, and Benjamin C. Nephew<sup>g</sup>

<sup>a</sup> Department of Civil and Environmental Engineering, Tufts University, 200 College Avenue, Medford, MA 02155, USA

<sup>b</sup> Department of Public Health and Community Medicine, Tufts University, 136 Harrison Avenue, Boston, MA 02111, USA

<sup>c</sup> Cummings School of Veterinary Medicine, Tufts University, 200 Westboro Road, North Grafton, MA 01536

<sup>d</sup> Worcester Polytechnic Institute, Bioinformatics and Computational Biology Program, 100 Institute Rd, Worcester, MA 01609

<sup>e</sup> Jonathan M. Tisch College of Civil Life, Tufts University, 10 Upper Campus Road, Medford, MA 02155, USA

<sup>f</sup> Department of Community Medicine and Health Care, University of Connecticut, 195 Farmington Ave., Farmington, CT 06032

<sup>g</sup> Worcester Polytechnic Institute, Department of Biology and Biotechnology, 100 Institute Rd, Worcester, MA 01609

Number of Figures: 2  
Number of Pages: 3

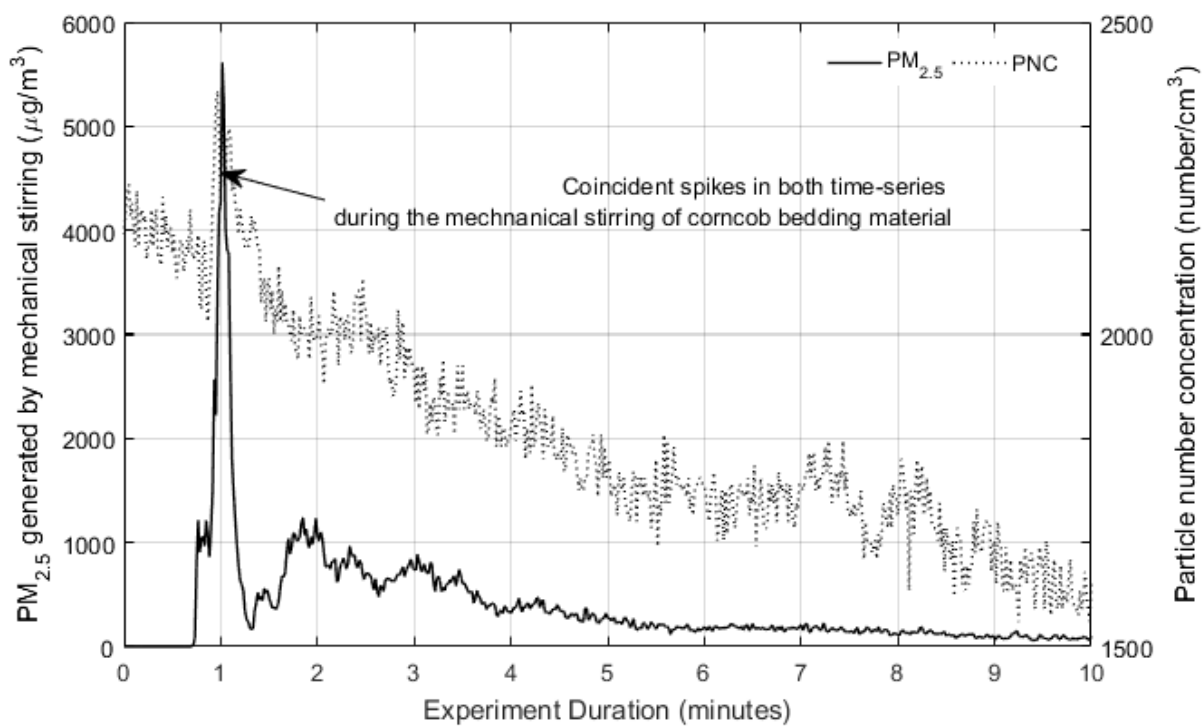

Figure S1: PM<sub>2.5</sub> and particle number concentrations generated by mechanical stirring of corncob bedding material during filter top present configuration.

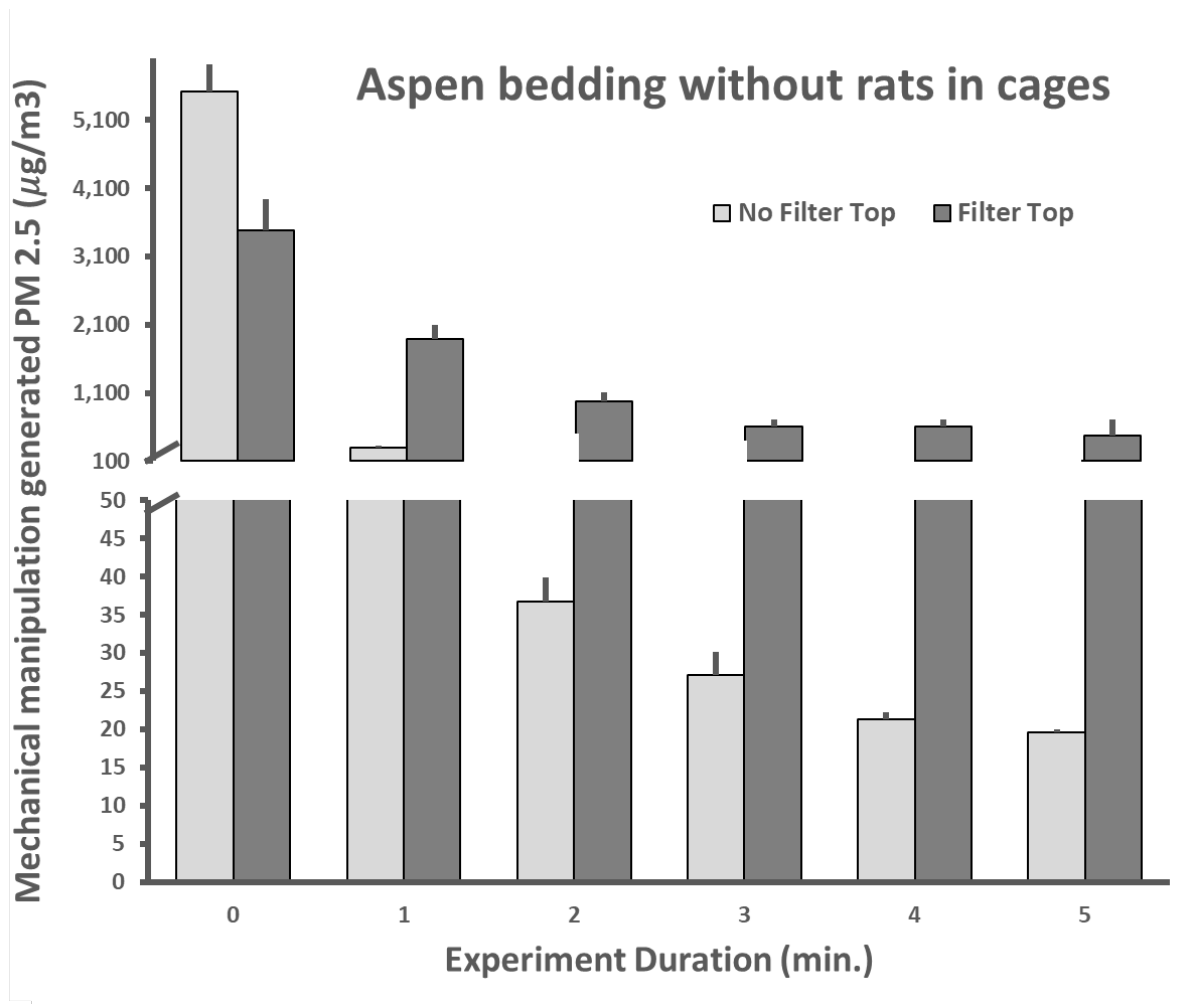

Figure S2: PM<sub>2.5</sub> generated by mechanical manipulation of aspen bedding material during filter top absent and present configurations.
